# Supplementary material
Source: MDPI journal article supplement (https://www.mdpi.com/2673-5601/1/4/36)
Supplement: s1 [file s1]

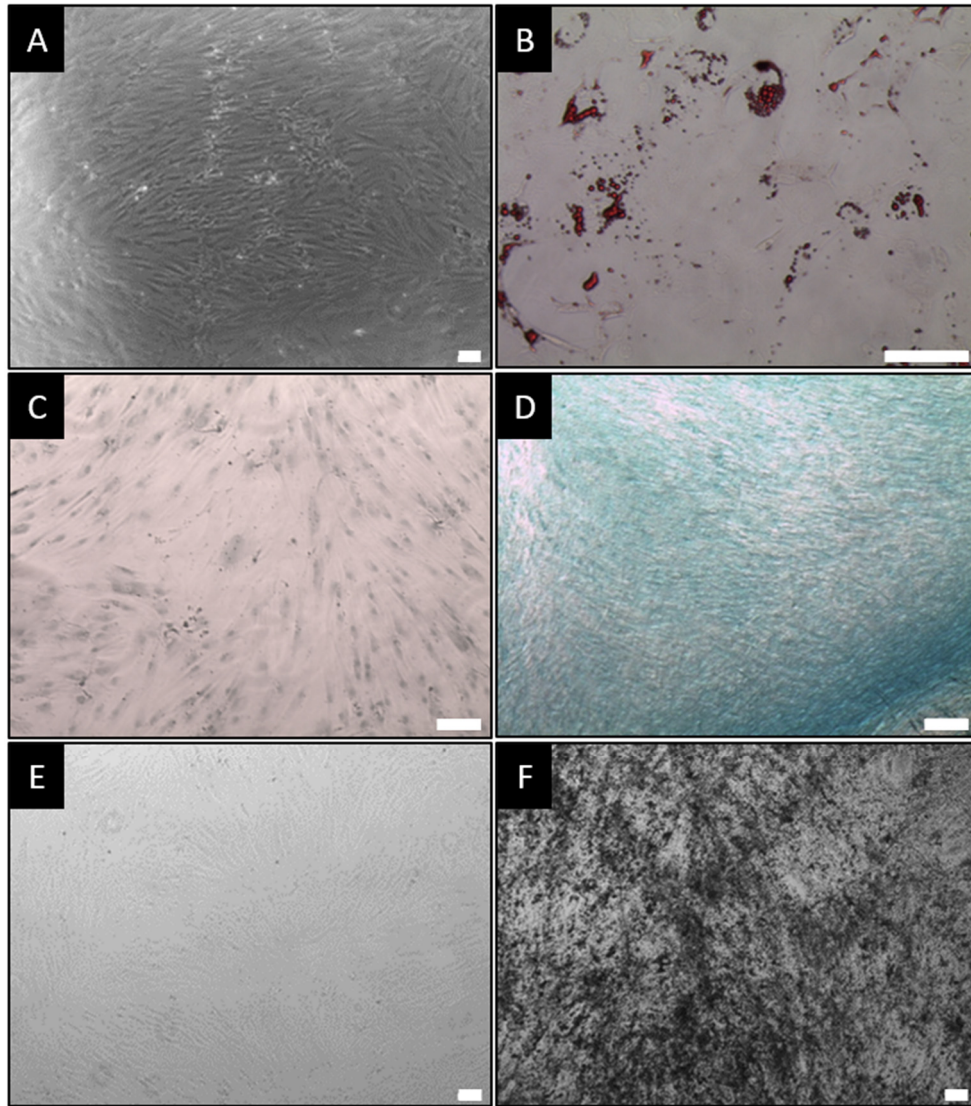

**Figure S1.** Adipogenic, chondrogenic, osteogenic differentiation of hMSCs including non-treated controls. Adipogenic differentiation of hMSCs was confirmed via Oil Red O staining of adipocytes on differentiation day 14 (A,B). Chondrogenic differentiation of hMSCs was confirmed via Alcian blue staining of the extracellular matrix on differentiation day 21 (C,D). Osteogenic differentiation of hMSCs was confirmed via light microscopy of calcium deposits on differentiation day 14 (E,F). Scale bar = 100  $\mu$ m.

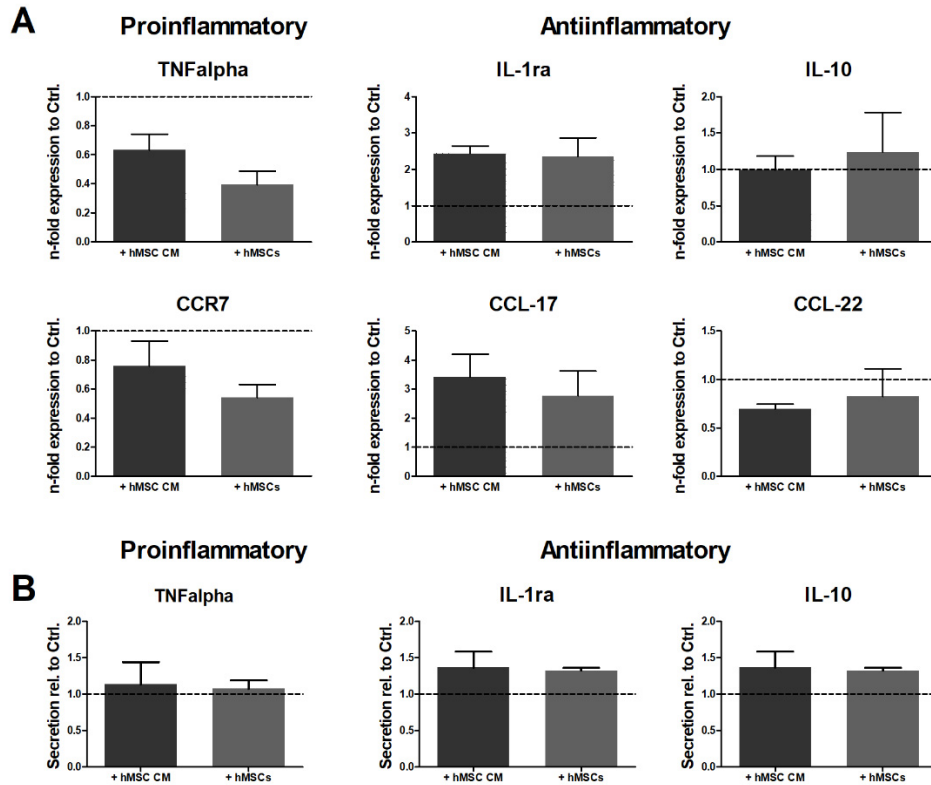

**Figure S2.** Coculture of hMSCs and M1 polarized THP-1 macrophages show no additional modulation on gene expression and cytokine secretion compared to hMSC conditioned media. Polarized M1 macrophages were incubated with conditioned medium of M1-primed hMSCs (+ hMSC CM) or directly cocultured with hMSCs (+ hMSCs) for 24 h and put in relation to the M1 macrophages incubated with control medium (Ctrl., dashed line). (A) Gene expression fold increase upon incubation with hMSC CM or coculture with hMSCs. Displayed are proinflammatory genes, TNFalpha and CCR7, and antiinflammatory genes, CCL-17, CCL-22, IL-1ra, and IL-10. (B) Cytokine secretion M1 macrophages upon incubation hMSC CM or coculture with hMSCs. Displayed are proinflammatory cytokine, TNFalpha, and antiinflammatory cytokines, IL-1ra and IL-10. Statistical significance was determined between hMSC CM and hMSC coculture treatment using t-test. No significant differences were observed. n=3.
